# Supplementary material for: Comparative genome analysis of lignin biosynthesis gene families across the plant kingdom
Source: PubMed Central journal article supplement (PMC3226193; doi:10.1186/1471-2105-10-s11-s3), 2009-10-08

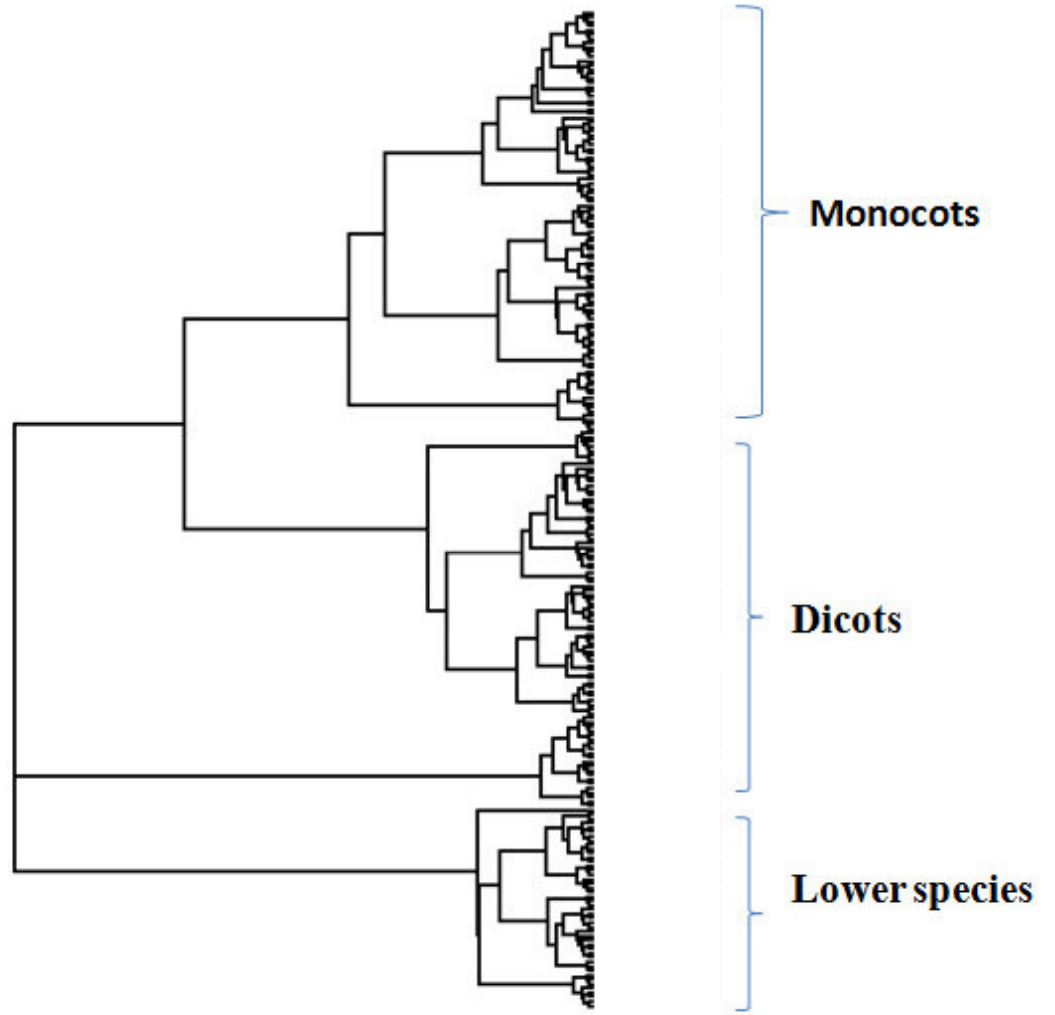

Supplement: 1471-2105-10-S11-S3-S3.pdf [file 1471-2105-10-S11-S3-S3.pdf]
